# Supplementary material
Source: PubMed Central journal article supplement (PMC6120187)
Supplement: supp_RA118.001953_135368_2_supp_167325_pbpw6z.pdf [file supp_RA118.001953_135368_2_supp_167325_pbpw6z.pdf]

SUPPLEMENTAL INFORMATION FOR:

**Activation of Smoothed in the Hedgehog pathway unexpectedly increases  
G $\alpha$ s-dependent cAMP levels in *Drosophila***

**Authors:** Samantha D. Praktijnjo, Farah Saad, Dominic Maier, Pamela Ip, and David R. Hipfner

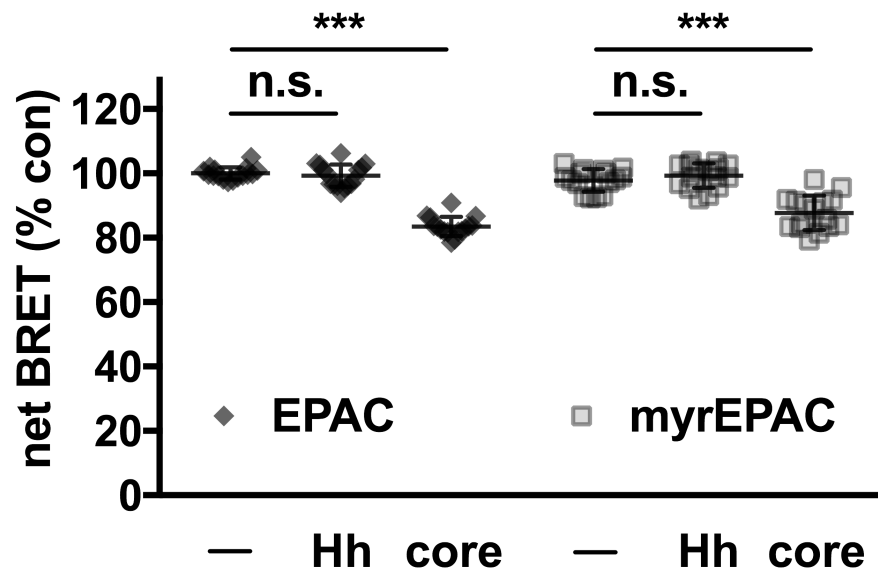

**Figure S1. Comparison of Hh/Smo<sup>core</sup>-dependent changes in total versus membrane cAMP pools.** *Left:* using the standard cytoplasmic EPAC cAMP biosensor in a BRET assay, Hh<sup>N</sup> expressing cells showed no significant change whereas cAMP levels are higher (lower net BRET signal) upon expression of Smo<sup>core</sup>. *Right:* myrEPAC, an EPAC cAMP biosensor targeted to the plasma membrane by fusion to the N-terminal myristoylation sequence of Drosophila Src64B (1), responds in the same manner to Hh and Smo<sup>core</sup> expression.

**Supplemental Methods:** To generate a membrane-localized form of the EPAC-BRET cAMP biosensor, the 14 amino acid myristoylation sequence from *Drosophila* Src64B (MGNKCCSKRQDQEL) was added to the N-terminus of the EPAC-BRET biosensor in the *pMT.puro/GFP10-EPAC-RLucII\_T781A,F782A* plasmid (described in (2)) by PCR. This tag has been shown to mediate plasma membrane localization of AKAR3, a similar genetically encoded intramolecular FRET-based biosensor of PKA activity (1). S2 cells were transfected and processed for BRET analysis essentially as described (3), using 100 ng of the plasmids encoding either cytoplasmic or membrane-associated EPAC-BRET proteins.

## References

1. Li, S., Ma, G., Wang, B., and Jiang, J. (2014) Hedgehog induces formation of PKA-Smoothed complexes to promote Smoothed phosphorylation and pathway activation. *Sci Signal* **7**, ra62
2. Cheng, S., Maier, D., and Hipfner, D. R. (2012) *Drosophila* G-protein-coupled receptor kinase 2 regulates cAMP-dependent Hedgehog signaling. *Development* **139**, 85-94
3. Maier, D., Cheng, S., Faubert, D., and Hipfner, D. R. (2014) A broadly conserved g-protein-coupled receptor kinase phosphorylation mechanism controls *Drosophila* smoothed activity. *PLoS Genet* **10**, e1004399
